# Supplementary material
Source: Royal Society of Chemistry journal article supplement (doi:10.1039/d6cy00035e)
Supplement: d6cy00035e1.pdf [file d6cy00035e1.pdf]

**Supplementary information**

**Efficient Hydrogen Production by  $\gamma$ -g-C<sub>3</sub>N<sub>4</sub>/Ag-CdS  
Heterojunction Photocatalyst via S-scheme Mechanism**

**K. S. Chandrakantha,<sup>a,g</sup> H. R. Deepu,<sup>a,b</sup> Mahesh Itagi,<sup>c</sup> Madhura N. Talwar,<sup>d</sup> Smitha  
Ankanahalli Shankaregowda,<sup>e</sup> K. Mantelingu,<sup>b</sup> P. Madhusudan,<sup>f</sup> S. Srikantaswamy,<sup>a</sup>**

**K. S. Rangappa,<sup>\*\*g</sup>**

*<sup>a</sup>Centre for Materials Science and Technology, Vijnana Bhavan, University of Mysore, Manasagangotri,  
Mysore 570006, India.*

*<sup>b</sup>Department of Studies in Chemistry, University of Mysore, Mysore-570005, Karnataka, India*

*<sup>c</sup>Department of Civil Engineering, Yeungnam University, Gyeongsan 38541, South Korea*

*<sup>d</sup>Department of Studies in Physics, University of Mysore, Mysore-570005, Karnataka, India*

*<sup>e</sup>Department of Electronics and Communication Engineering, BGS Institute of Technology, Adichunchanagiri  
University, BG Nagara-571448, Karnataka, India*

*<sup>f</sup>Department of Civil and Environmental Engineering, Hanyang University, Seoul, South Korea<sup>g</sup>Institution of  
Excellence, Vijnana Bhavan, University of Mysore, Manasagangotri, Mysore 570006, India.*

**Corresponding Author\*: K. S. Rangappa ([rangappaks@ioe.uni-mysore.ac.in](mailto:rangappaks@ioe.uni-mysore.ac.in))**

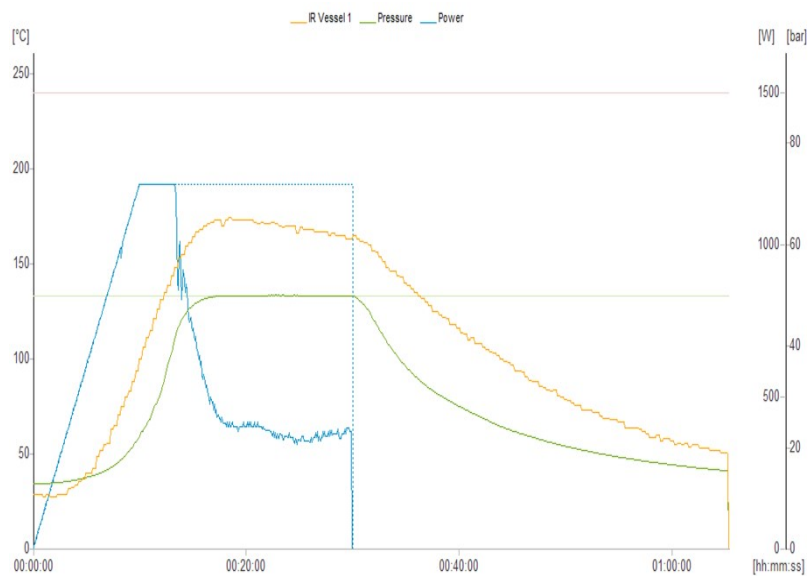

**Fig S1:** Microwave Hydrothermal experimental conditions (System Generated)

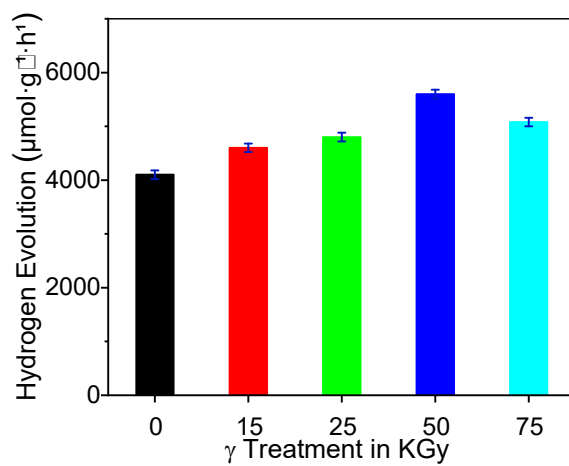

**Fig S2:** Hydrogen evolution from 15 kGy, 25 kGy, 50 kGy, and 75 kGy gamma irradiated g- $\text{C}_3\text{N}_4/\text{Ag-CdS}$

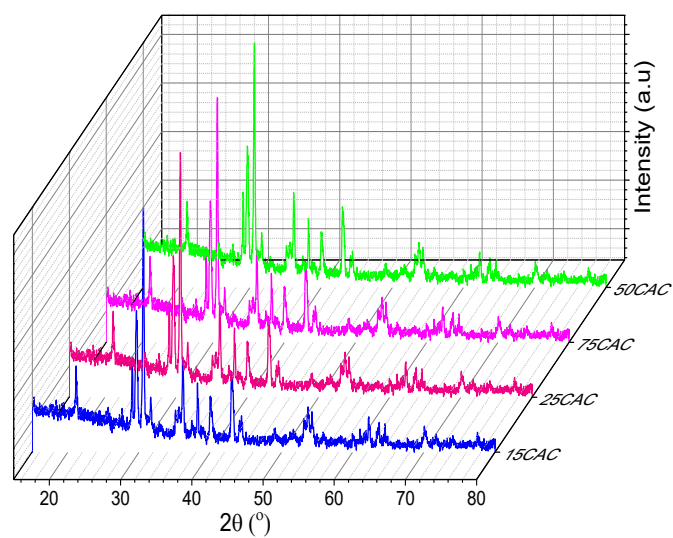

**Fig. S3:** XRD spectra of the recycled catalyst (15 kGy, 25 kGy, 50 kGy, and 75 kGy) gamma-irradiated  $g-C_3N_4/Ag-CdS$

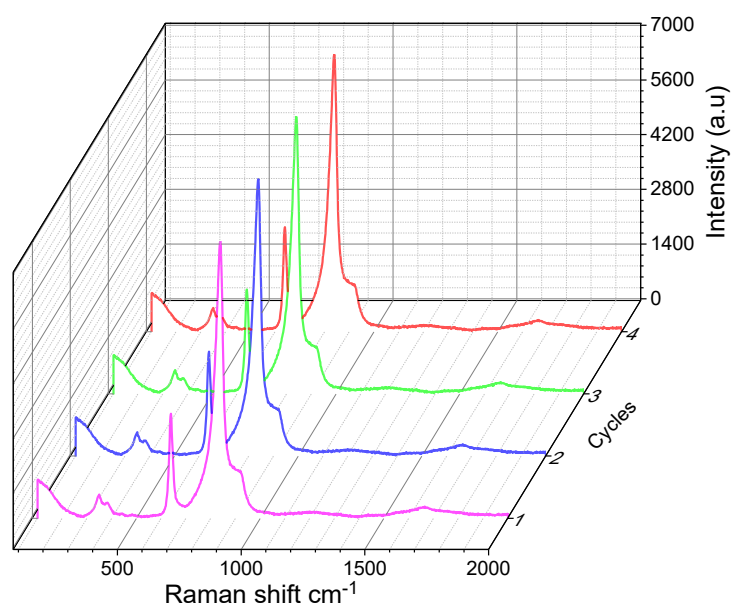

**Fig. S4:** Raman spectra of 50 kGy gamma-irradiated  $g-C_3N_4/Ag-CdS$  recycled catalyst after 4 hr of photocatalytic experiment
